# Supplementary material
Source: PubMed Central journal article supplement (PMC2867713)
Supplement: 0911346107_pnas.200911346SI.pdf [file 0911346107_pnas.200911346SI.pdf]

# Supporting Information

Bassett et al. 10.1073/pnas.0911346107

## SI Materials and Methods

**D2KO and D1/D2KO Mice.** WT mice, mice deficient in type 2 deiodinase (D2KO), and mice deficient in type 1 deiodinase (D1KO) mice were established in a C57BL/6J background and maintained as homozygous colonies (1, 2). D2KO and D1KO mice were crossed to obtain double-heterozygous F1 progeny, which were bred to maintain a colony of D1/D2KO homozygous double mutants. Mice were housed under conditions of controlled lighting and temperature. Some mice were given two i.p. injections of calcein (15mg/kg in saline with 2% NaHCO<sub>3</sub>) 7 and 4 days before killing at postnatal day (PD) 112. Adult male WT mice were rendered hypothyroid or thyrotoxic for 6 weeks. Hypothyroidism was induced by feeding a low-iodine diet supplemented with 0.15% propylthiouracil (Harlan Teklad Co). Thyrotoxicosis was induced by suppressive doses of thyroxine (T4) (0.0012%) in the drinking water. The concentration of T4 was adjusted according to intake in 2-week cycles (3). Serum free T4 and free 3, 5, 3'-L-triiodothyronine (T3) levels were measured on an Abbott ARCHITECT i2000 auto-analyzer (Abbott Laboratories); interassay coefficients of variation (CV) were below 10.4%, 10.0%, and 4.0%, respectively.

**Faxitron Point Projection Microradiographic Analysis.** Long bones and tail vertebrae were stored in 70% ethanol at 4 °C. Soft tissue was removed, and digital x-ray images were recorded at 10- $\mu$ m pixel resolution using a Qados Faxitron MX20 variable kV point projection x-ray source and digital image system operating at 26 kV and 5 $\times$  magnification (Cross Technologies plc). Magnifications were calibrated by imaging a digital micrometer, and long bone lengths were determined using ImageJ 1.41 software (<http://rsb.info.nih.gov/ij/>). Cortical bone thickness and diameter were determined in at least 10 locations at the midfemoral diaphysis in both anterior–posterior and medial–lateral projections. The relative mineral content of calcified tissues was determined by comparison with the following standards included in each image frame: a 1-mm thick steel plate, a 1-mm diameter spectrographically pure aluminum wire, and a 1-mm diameter polyester fiber. Sixteen-bit (2368  $\times$  2340) DICOM images were converted to 8-bit Tiff images using ImageJ, and the histogram stretched from the polyester (gray level 0) to the steel (gray level 255) standards. Increasing gradations of mineralization density were represented in 16 equal intervals by a pseudocolor scheme for presentation of digital images.

**Quantitative Backscattered Electron Scanning Electron Microscopy Analysis of Bone Mineralization.** The distribution of bone mineralization densities was analyzed at cubic-micrometer voxel resolution by quantitative backscattered electron scanning electron microscopy (qBSE-SEM) (4–6). Bones were fixed in 10% neutral buffered formalin for 24 h and transferred to 70% ethanol before embedding in polymethyl methacrylate (PMMA). Block faces were cut through specimens, which then were polished, coated with carbon, and analyzed in a Zeiss DSM962 digital scanning electron microscope equipped with an annular solid-state BSE detector (KE Electronics) and operated at 20 kV and 0.5 nA at a 17-mm working distance (11 mm sample to detector). Mineralization densities were determined by comparison with halogenated dimethacrylate standards: C<sub>22</sub>H<sub>25</sub>O<sub>10</sub>Br [mean BSE coefficient according to the procedure of Lloyd (7) = 0.1159] to C<sub>22</sub>H<sub>25</sub>O<sub>10</sub>I (mean BSE coefficient = 0.1519). Increasing gradations of mineralization density were represented in eight equal intervals by a pseudocolor scheme (4–6).

**MicroCT Analysis.** Tibias from WT and D1/D2KO mice were analyzed by microCT (Skyscan 1172a) at 50 kV and 200  $\mu$ A using a 0.5-mm aluminum filter and a detection pixel size of 4.3  $\mu$ m<sup>2</sup>. Images were captured every 0.7° through 180° rotation of each bone. Scanned images were reconstructed using Skyscan NRecon software. A volume of 1 mm<sup>3</sup> of trabecular bone was selected as the region of interest, 0.2 mm from the growth plate. Trabecular bone volume as proportion of tissue volume (BV/TV, %), trabecular thickness (Tb.Th, mm), trabecular separation (Tb.Sp, mm), trabecular number (Tb.N, mm<sup>-1</sup>), and structure model index (SMI) were analyzed in the region of interest using the Skyscan CT analysis software.

**Mechanical Testing.** Femurs from PD112 mice were stored and tested in 70% ethanol. The anterior–posterior middiaphyseal cortical thickness (Tap) and diameter (Dap), and the medial–lateral cortical thickness (Tml) and diameter (Dml) of individual bones were determined in Faxitron images using ImageJ. Destructive three-point bend tests were performed on an Instron 5543 materials-testing load frame (Instron Limited) using custom-built mounts incorporating rounded supports to minimize cutting and shear loads. Biomechanical variables can be derived from load displacement curves and cortical bone thickness measurements (8–11). Bones were positioned horizontally and centered on custom supports with the anterior surface upward. Load (F) was applied vertically to the midshaft with a constant rate of displacement of 0.03 mm/second until fracture. A span (L) of 5.6 mm was used. Load-displacement curves were plotted, and yield load (Fy), displacement at yield ( $\delta$ ), maximum load (Fm), and fracture load (F#) were determined. Stiffness, i.e., the slope of the linear (elastic) part of the load–displacement curve, was calculated by the least squares method. The moment of inertia (I: second moment of area) was calculated by adding the cylindrical and upper and lower linear components: I-total = I<sub>tube</sub> + I<sub>linear</sub>. The cylindrical component was calculated according to the formula I<sub>tube</sub> = Tml  $\times$  r<sup>3</sup>  $\times$   $\pi$  where r = (Dap/2) – (Tml/2). The linear component was calculated according to the formula I<sub>linear</sub> = 2(Dml – Dap)  $\times$  Tap [(Dap – Tap)<sup>2</sup>/4] (Fig. S1A). Young's modulus (E) was calculated according to the formula E = Fy  $\times$  L<sup>3</sup>/ $\delta$   $\times$  48  $\times$  I<sub>total</sub>. Yield stress ( $\sigma$ y) was calculated according to the formula  $\sigma$ y = Fy  $\times$  L  $\times$  (Dap/2)/4  $\times$  I<sub>total</sub>. Work energy was calculated from the area under the load displacement curve at both maximum load and fracture. Elastic stored energy at maximum load was determined by calculating the area of a right-angled triangle with the vertex at the point of maximum load and a hypotenuse with a slope equal to that of the linear phase of the load–displacement curve (Fig. S1B). Elastic stored energy at fracture was calculated similarly but with the vertex of the triangle at the point of fracture. Energy dissipated at maximum load was calculated by subtracting the elastic stored energy from the work energy at maximum load. Crack toughness was determined by dividing the energy dissipated at fracture by the area of the fracture surface.

**Skeletal Preparations.** PD1 mice and limbs from PD14, PD21, PD28, PD56, and PD112 animals were stained with alizarin red and Alcian blue and cleared in KOH glycerol (12, 13). Preparations were photographed using a Leica MZ75 binocular microscope (Leica AG), Leica KL1500 light source, Leica DFC320 digital camera, and Leica IM50 Digital Image Manager. Bone lengths were determined digitally following linear calibration of pixel size. Skull dimensions and open fontanel and suture areas were calculated using Image J.

**Histology.** Limbs were fixed in 10% neutral buffered formalin for 24 h and decalcified in 10% formic acid or 10% EDTA. PD1 limbs were decalcified for 24 h; PD14, PD21, and PD28 limbs were decalcified for 5 days; and PD56 and PD112 limbs were decalcified for 7–10 days. Decalcified bones were embedded in paraffin, and 3- $\mu$ m sections were cut onto 3-aminopropyltriethoxysilane (APES)-coated slides (Sigma-Aldrich Chemical Company), deparaffinized in xylene, rehydrated, and stained with van Gieson and Alcian blue.

**Histological Analysis of Growth Plate and Cortical Bone Dimensions.** Collagen II and collagen X mRNA expression was analyzed by in situ hybridization to identify proliferative and hypertrophic zones in growth plate sections, as described in previous studies in which methods were optimized (14–17), and expression of the T3 target gene *Fgfr1* was determined to characterize cellular thyroid status in osteoblasts and chondrocytes (18, 19). Measurements of at least four separate positions across the width of growth plates were obtained using a Leica DM LB2 microscope and Leica DFC320 digital camera to calculate mean values for the heights of the reserve zone, proliferative zone, hypertrophic zone, and total growth plate in sections of proximal tibia. Results from two different levels of sectioning were compared to ensure consistency of the data. Cortical bone measurements were performed in longitudinal and transverse sections. At least 10 separate positions in the midshaft of long bones were analyzed, and adjacent levels of sectioning were compared to ensure consistency.

**Measurement of Bone Turnover Markers.** Serum samples were obtained from P91 WT and D1/D2KO mice at sacrifice and were stored at  $-80^{\circ}\text{C}$ . N-terminal propeptide of type I procollagen (P1NP) and C-terminal cross-linked telopeptide of type I collagen (CTX) levels were determined by enzyme immunoassay using IDS kits AC-33F1 and AC-06F1, respectively (Immunodiagnostic Systems). Osteocalcin levels were determined by immunoradiometric assay using the Immotopics kit 50–1300 (Immotopics). Tartrate-resistant acid phosphatase form 5b (TRAP) levels were determined by a solid-phase immunofixed enzyme activity assay using the IDS kit SB-TR103. All assays were performed according to manufacturers' instructions.

**Osteoclast Histomorphometry.** Osteoclast numbers were determined in samples fixed for 48 h in 10% neutral buffered formalin and decalcified in 10% EDTA, pH 7.4, for 28 days. Decalcified bones were embedded in paraffin, and 3- $\mu$ m midline longitudinal sections were cut onto Superfrost plus slides (VWR Limited). Sections were deparaffinized, rehydrated, and stained for TRAP using a Sigma TRAP kit (386A-1KT) according to manufacturer's instructions, except that fast garnet dye was diluted 10-fold, and the incubation time was 20 min. Sections were photographed at  $\times 200$  magnification using a Leica DM LB2 microscope and DFC320 digital camera, and a montage of nine overlapping fields was constructed for each bone. Osteoclast numbers (Oc.N) and surface (Oc.S) were determined in both trabecular and endosteal bone and were normalized to total bone surface. All measurements were commenced 500  $\mu$ m inferior to the growth plate (14, 15).

**BSE-SEM Analysis of Bone Surfaces and Microarchitecture.** Freshly dissected bones were fixed and stored in 70% ethanol. Bones were opened longitudinally along anatomical curvatures using a fine tungsten carbide milling tool in a dental workshop handpiece to remove half the cortical bone and medullary trabecular elements. Samples were cleaned of cell remnants by maceration with an

alkaline bacterial pronase, which also removes unmineralized cartilage matrix. Samples were coated with carbon and imaged using backscattered electrons at 20-kV beam potential. The images provide detailed views of bone surfaces and microarchitecture from which surface activity states (forming, resting, resorbing, resorbed) can be investigated (20, 21).

**Confocal Microscopy Analysis of Bone Formation.** Midline longitudinal and midcoronal block faces were cut through PMMA-embedded long bones and calvaria. Specimens were polished to an optically flat finish and examined using confocal autofluorescence scanning light microscopy (CSLM) of calcein labels to determine the fraction of bone surface undergoing active bone formation (22). Two systems were used: (i) an Odyssey (Noran) microscope using 488-nm excitation, a 60 $\times$ /1.4NA objective, and a pass filter, and (ii) a Leica SP2 reflection confocal microscope using 488-nm excitation and 25 $\times$ /1.0 and 40 $\times$ /1.25 objectives, which generated combined reflection (blue), calcein fluorescence (green), and autofluorescence (red) CSLM images. Tissue layers immediately deep to the block surface were visualized to ensure that only fluorescently labeled bone-forming surfaces that lie in orthogonal planes were analyzed (6, 23, 24). Calcein separation in trabecular and calvarial bone was measured from the Odyssey images using a TN8500 image processor (Noran). The mineral apposition rate (MAR) was calculated by determining calcein separation at 10 to 20 locations per specimen. Montages of trabecular and calvarial bone were generated, and the bone surface and mineralizing surface were measured using ImageJ. Montages of 12 (magnification  $\times 25$ ) or 20 (magnification  $\times 40$ ) overlapping CSLM fields also were constructed for each bone. Trabecular and endosteal bone surfaces were determined using ImageJ. Mineralizing surface and MAR were determined by quantifying calcein-labeled surfaces and the mean separation between calcein double labels. Bone formation rate was calculated from the product of mineralizing surfaces and MAR. All measurements commenced 500  $\mu$ m inferior to the growth plate.

**Osteoblast Histomorphometry.** Midline sagittal sections (5  $\mu$ m) were cut from PMMA-embedded specimens using a Leica RM2245 microtome. Sections were mounted on Fol's coated slides [1.5% gelatin, 1% CrK(SO<sub>4</sub>)<sub>2</sub> in 30% ethanol], incubated at 37  $^{\circ}\text{C}$  overnight, deplasticized in Cellosolve (Sigma), rehydrated in graded ethanols, and stained with toluidine blue (2% toluidine blue in 5 mM disodium hydrogen phosphate, 8 mM citric acid, pH 3.7) for 5 min before destaining in butanol and toluidine blue buffer. Sections were imaged with a Leica DM LB2 microscope and DFC320 digital camera using a 20 $\times$ /0.40 objective. Montages of metaphyseal trabecular bone were generated, and at least two different levels of section were compared to ensure consistency of data. Primary histomorphometric indices of bone formation were determined using ImageJ according to the standard American Society for Bone and Mineral Research system of nomenclature (25).

**Statistical Analysis.** Normally distributed data were analyzed by Student's *t* test or ANOVA followed by Tukey's multiple comparison post hoc test. *P* values  $< 0.05$  were considered significant. Frequency distributions of bone micromineralization densities obtained by Faxitron and qBSE were compared using the Kolmogorov-Smirnov test, in which *P* values for the *D* statistic in 1024-pixel data sets were  $D \geq 6.01$ ,  $P < 0.05$ ;  $D \geq 7.20$ ,  $P < 0.01$ ; and  $D \geq 8.62$ ,  $P < 0.001$ .

1. Schneider MJ, et al. (2001) Targeted disruption of the type 2 selenodeiodinase gene (DIO2) results in a phenotype of pituitary resistance to T4. *Mol Endocrinol* 15: 2137–2148.
2. Schneider MJ, et al. (2006) Targeted disruption of the type 1 selenodeiodinase gene (Dio1) results in marked changes in thyroid hormone economy in mice. *Endocrinology* 147:580–589.

3. Weiss RE, et al. (1998) Thyroid hormone action on liver, heart, and energy expenditure in thyroid hormone receptor beta-deficient mice. *Endocrinology* 139:4945–4952.
4. Boyde A, Firth EC (2005) Musculoskeletal responses of 2-year-old Thoroughbred horses to early training. 8. Quantitative back-scattered electron scanning electron microscopy and confocal fluorescence microscopy of the epiphysis of the third metacarpal bone. *N Z Vet J* 53:123–132.



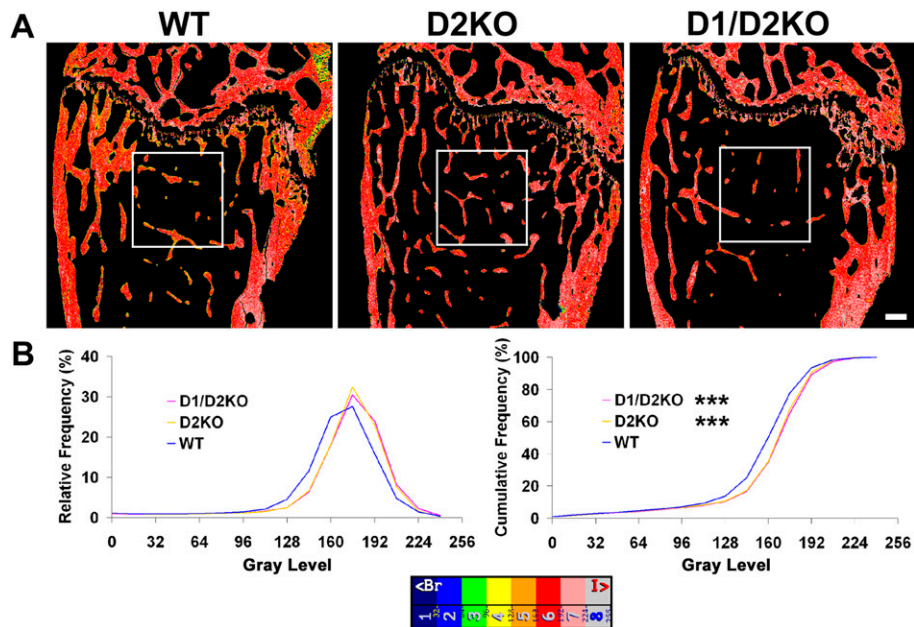

**Fig. S2.** Bone micromineralization density in long bones from D2KO and D1/D2KO mice. (A) Longitudinal sections of distal femur from PD112 WT, D2KO, and D1/D2KO mice imaged by qBSE-SEM (magnification  $\times 33$ ). Gray-scale images were pseudocolored according to an eight-color palette in which low mineralization density is blue and high density is gray. Boxes indicate trabecular bone regions of interest analyzed in the high-power views shown in Fig. 2C. (Scale bar, 200  $\mu\text{m}$ .) (B) Relative and cumulative frequency histograms of combined trabecular and cortical bone micromineralization densities of femur, tibia, and humerus. Kolmogorov-Smirnov test; \*\*\*,  $P < 0.001$  versus WT ( $n = 4$ ).

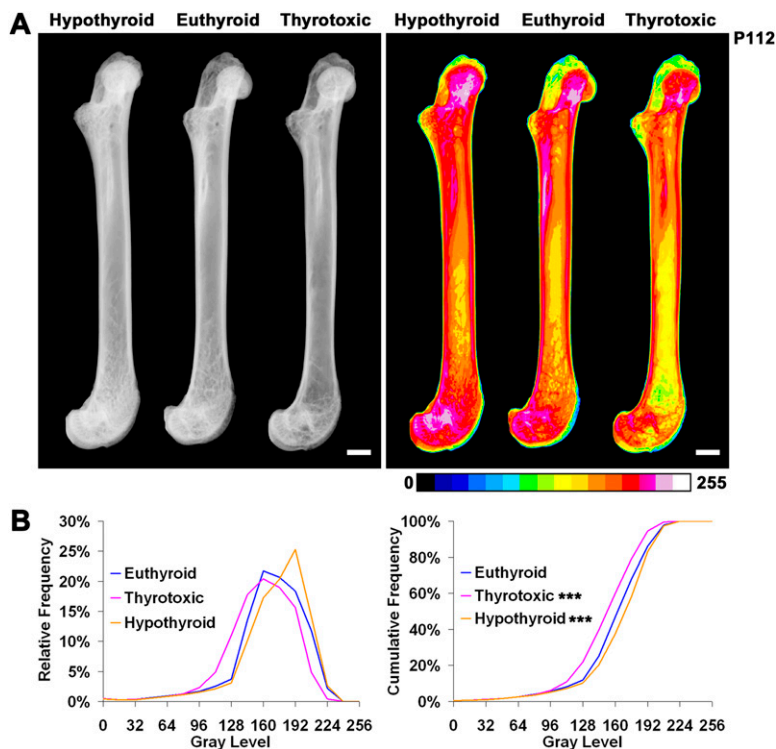

**Fig. S3.** Bone mineral content in adult male WT mice rendered euthyroid, thyrotoxic, or hypothyroid for 6 weeks before killing. Free thyroxine and free 3,5,3'-L-triiodothyronine levels were reduced by more than 60% in hypothyroid mice and were increased more than 10-fold in thyrotoxic animals. (A) Faxitron images of femurs from PD112 hypothyroid, euthyroid, and thyrotoxic mice. Gray-scale images were pseudocolored according to a 16-color palette; low mineralization density is black, high density is white. (Scale bar, 1000  $\mu\text{m}$ .) (B) Relative and cumulative frequency histograms of mineralization densities from whole femur. Kolmogorov-Smirnov test; \*\*\*,  $P < 0.001$  versus euthyroid ( $n = 3$ ).



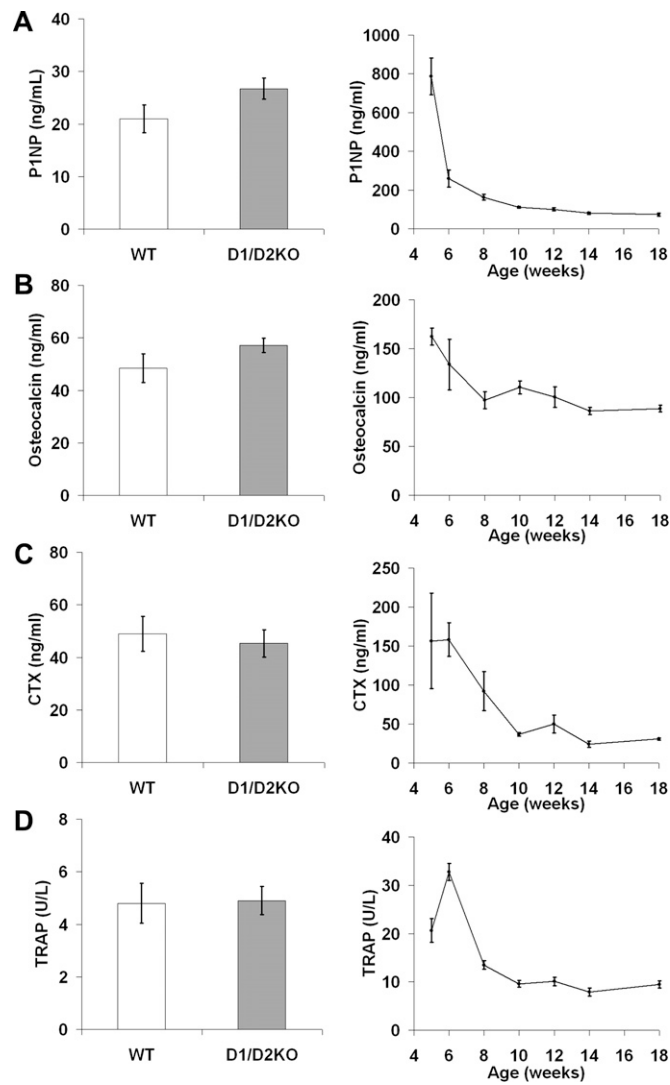

**Fig. S6.** Measurement of serum markers of bone formation (A and B) and bone resorption (C and D) in PD91 male WT and D1/D2KO mice. Student's *t* test ( $n = 7$ ). The age-related decreases in serum markers in male WT mice (mean  $\pm$  SEM;  $n = 5$ ) are shown in the right hand graphs. (A) N-terminal propeptide of type 1 procollagen (P1NP). (B) Osteocalcin. (C) C-terminal cross-linked telopeptide of type I collagen (CTX). (D) Tartrate-resistant acid phosphatase form 5b (TRAP).
